# Supplementary material
Source: PubMed Central journal article supplement (PMC2772409)

## Supplementary Figures

**FIG. S1.** H<sub>2</sub>O<sub>2</sub>-dependent *Leishmania major* promastigote cell death. The data shown are means ± SEM.

**FIG. S2.** Confocal imaging of JC-1 labeled control (CT) and LmAPX overexpressing (OE) cells with indicated time and treatment. Data were representative of one of three similar results.

**FIG. S3.** Confocal imaging of Annexin-V labeled control (CT) and LmAPX overexpressing (OE) cells with indicated time and treatment. Results were representative of three independent experiments.

FIG. S1.

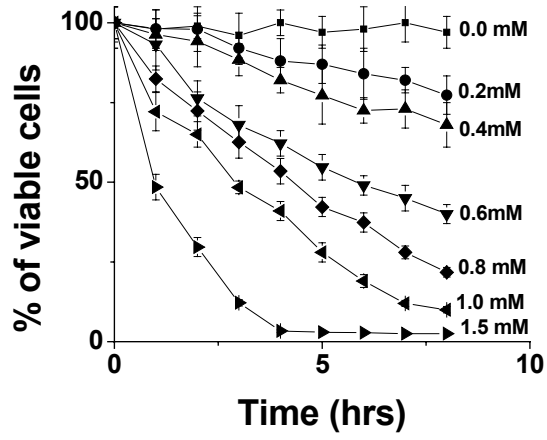

**FIG. S2.**

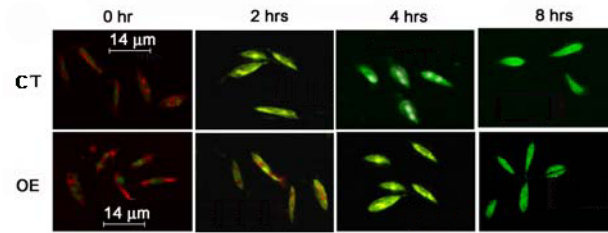

**FIG. S3**

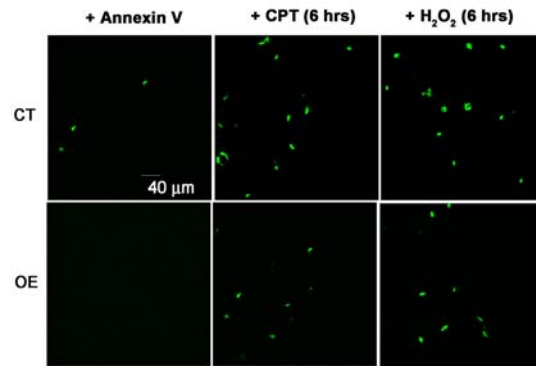

Supplement: EC.00198-09_1.pdf [file EC.00198-09_1.pdf]
